# Supplementary material for: Validity of Willingness to Pay Measures under Preference Uncertainty
Source: PLOS journal article supplement (doi:10.1371/journal.pone.0154078), 2016-04-20
Supplement: S1 (10.1371/journal.pone.0154078.s001) [file journal.pone.0154078.s001.pdf]

Braun, Carola; Rehdanz, Katrin; Schmidt, Ulrich

Article — Published Version

## Validity of Willingness to Pay Measures under Preference Uncertainty

PLoS ONE

**Provided in Cooperation with:**

Kiel Institute for the World Economy – Leibniz Center for Research on Global Economic Challenges

*Suggested Citation:* Braun, Carola; Rehdanz, Katrin; Schmidt, Ulrich (2016) : Validity of Willingness to Pay Measures under Preference Uncertainty, PLoS ONE, ISSN 1932-6203, Public Library of Science, San Francisco, Vol. 11, Iss. 4, pp. e0154078-, <https://doi.org/10.1371/journal.pone.0154078>

This Version is available at:

<https://hdl.handle.net/10419/141320>

**Standard-Nutzungsbedingungen:**

Die Dokumente auf EconStor dürfen zu eigenen wissenschaftlichen Zwecken und zum Privatgebrauch gespeichert und kopiert werden.

Sie dürfen die Dokumente nicht für öffentliche oder kommerzielle Zwecke vervielfältigen, öffentlich ausstellen, öffentlich zugänglich machen, vertreiben oder anderweitig nutzen.

Sofern die Verfasser die Dokumente unter Open-Content-Lizenzen (insbesondere CC-Lizenzen) zur Verfügung gestellt haben sollten, gelten abweichend von diesen Nutzungsbedingungen die in der dort genannten Lizenz gewährten Nutzungsrechte.

**Terms of use:**

*Documents in EconStor may be saved and copied for your personal and scholarly purposes.*

*You are not to copy documents for public or commercial purposes, to exhibit the documents publicly, to make them publicly available on the internet, or to distribute or otherwise use the documents in public.*

*If the documents have been made available under an Open Content Licence (especially Creative Commons Licences), you may exercise further usage rights as specified in the indicated licence.*

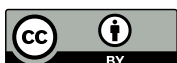

<http://creativecommons.org/licenses/by/4.0/>

## Willingness to pay questions

### Introductory question

Please consider the following situation:

Assume that the two-degree target is to be met. The international community sees two options for achieving the two-degree target:

1. Use of solar radiation management (SRM)
2. Reinforced expansion of renewable energies and improvement of energy efficiency (EE)

Assume first that, independently of the actual costs, both options would be equally costly. Which option would you prefer for achieving the two-degree target?

- Solar radiation management (SRM)
- Reinforced expansion of renewable energies and improvement of energy efficiency (EE)
- Don't know

**Survey A: Point-WTP question**

**(If the respondent chose EE in response to the introductory question)**

Assume now that *reinforced expansion of renewable energies and improvement of energy efficiency (EE)* costs more than *solar radiation management (SRM)* and that EE would involve monthly costs for you.

Please answer the question assuming that you would actually have to pay the amount each month in addition to your monthly ongoing expenses for accommodation, accessory charges, daily needs and further purchases.

What is the maximum amount of money you would be willing to pay each month in order to achieve the two-degree target via reinforced expansion of renewable energies and improvement of energy efficiency (EE) rather than the use of SRM?

Please state the maximum amount here:

EUR \_\_\_\_\_

**Survey A: Point-WTP question**

**(If the respondent chose SRM in response to the introductory question)**

Assume now that *solar radiation management (SRM)* costs more than *reinforced expansion of renewable energies and improvement of energy efficiency (EE)* and that the use of SRM would involve monthly costs for you.

Please answer the question assuming that you would actually have to pay the amount each month in addition to your monthly ongoing expenses for accommodation, accessory charges, daily needs and further purchases.

What is the maximum amount of money you would be willing to pay each month in order to achieve the two-degree target via the use of solar radiation management (SRM) rather than EE?

Please state the maximum amount here:

EUR \_\_\_\_\_

**Survey B: Range-WTP question: (if the respondent chose EE in response to the introductory question)**

Assume now that *reinforced expansion of renewable energies and improvement of energy efficiency (EE)* costs more than *solar radiation management (SRM)* and that EE would involve monthly costs for you.

Please answer the question assuming that you would actually have to pay the amount each month in addition to your ongoing monthly expenses for accommodation, accessory charges, daily needs and further purchases.

Up to which level of costs for yourself would you definitely choose EE?

EUR \_\_\_\_\_

At or above which level of costs for yourself would you definitely no longer choose EE but SRM?

EUR \_\_\_\_\_

**Survey B: Range-WTP question: (if the respondent chose SRM in response to the introductory question)**

Assume now that *solar radiation management (SRM)* costs more than *reinforced expansion of renewable energies and improvement of energy efficiency (EE)* and that the use of SRM would involve monthly costs for you.

Please answer the question assuming that you would actually have to pay the amount each month in addition to your ongoing monthly expenses for accommodation, accessory charges, daily needs and further purchases.

Up to which level of costs for yourself would you definitely choose SRM?

EUR \_\_\_\_\_

At or above which level of costs for yourself would you definitely no longer choose SRM but EE?

EUR \_\_\_\_\_
