# Supplementary material for: Validity of Willingness to Pay Measures under Preference Uncertainty
Source: PLOS journal article supplement (doi:10.1371/journal.pone.0154078), 2016-04-20
Supplement: S3 (10.1371/journal.pone.0154078.s003) [file journal.pone.0154078.s003.pdf]

Braun, Carola; Rehdanz, Katrin; Schmidt, Ulrich

Article — Published Version

## Validity of Willingness to Pay Measures under Preference Uncertainty

PLoS ONE

**Provided in Cooperation with:**

Kiel Institute for the World Economy – Leibniz Center for Research on Global Economic Challenges

*Suggested Citation:* Braun, Carola; Rehdanz, Katrin; Schmidt, Ulrich (2016) : Validity of Willingness to Pay Measures under Preference Uncertainty, PLoS ONE, ISSN 1932-6203, Public Library of Science, San Francisco, Vol. 11, Iss. 4, pp. e0154078-, <https://doi.org/10.1371/journal.pone.0154078>

This Version is available at:

<https://hdl.handle.net/10419/141320>

**Standard-Nutzungsbedingungen:**

Die Dokumente auf EconStor dürfen zu eigenen wissenschaftlichen Zwecken und zum Privatgebrauch gespeichert und kopiert werden.

Sie dürfen die Dokumente nicht für öffentliche oder kommerzielle Zwecke vervielfältigen, öffentlich ausstellen, öffentlich zugänglich machen, vertreiben oder anderweitig nutzen.

Sofern die Verfasser die Dokumente unter Open-Content-Lizenzen (insbesondere CC-Lizenzen) zur Verfügung gestellt haben sollten, gelten abweichend von diesen Nutzungsbedingungen die in der dort genannten Lizenz gewährten Nutzungsrechte.

**Terms of use:**

*Documents in EconStor may be saved and copied for your personal and scholarly purposes.*

*You are not to copy documents for public or commercial purposes, to exhibit the documents publicly, to make them publicly available on the internet, or to distribute or otherwise use the documents in public.*

*If the documents have been made available under an Open Content Licence (especially Creative Commons Licences), you may exercise further usage rights as specified in the indicated licence.*

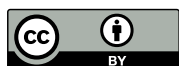

<http://creativecommons.org/licenses/by/4.0/>

**Table A-I: Summary Statistics**

| <i>Variables</i>                                     | <i>Domain</i>                                                 | <i>Survey A</i> |                           | <i>Survey B</i> |                           |
|------------------------------------------------------|---------------------------------------------------------------|-----------------|---------------------------|-----------------|---------------------------|
|                                                      |                                                               | <i>mean</i>     | <i>standard deviation</i> | <i>mean</i>     | <i>standard deviation</i> |
| Awareness                                            | 0 (have never heard);<br>1 (have heard at least a little bit) | 0.19            | 0.39                      | 0.23            | 0.42                      |
| Acceptance                                           | 1 (strongly disagree) – 4 (strongly agree)                    | 2.09            | 0.93                      | 2.07            | 0.91                      |
| Risk perception                                      | 1 (very small) – 4 (very large)                               | 3.23            | 0.74                      | 3.29            | 0.74                      |
| Benefit perception                                   | 1 (very small) – 4 (very large)                               | 2.45            | 0.78                      | 2.43            | 0.77                      |
| Emotions (negative)*                                 | 1 (not at all) – 4 (strongly)                                 | 0.002           | 0.81                      | 0.002           | 0.81                      |
| Emotions (positive)*                                 | 1 (not at all) – 4 (strongly)                                 | -0.007          | 0.88                      | 0.003           | 0.91                      |
| Gender                                               | 0 (male); 1 (female)                                          | 47%             |                           | 51%             |                           |
| High education                                       | 0 (other); 1 (A level)                                        | 34%             |                           | 34%             |                           |
| Income (monthly household income in €, net of taxes) | 250 – 10,000                                                  | 2400.47         | 1565.56                   | 2483.25         | 1478.38                   |
| Age                                                  | 18 – 87                                                       | 47              | 15.42                     | 46              | 15.21                     |
| N                                                    |                                                               | 776             |                           | 663             |                           |

Note: \* Mean values for emotions are averages of standardised items (mean = 0, standard deviation = 1). Items for negative emotions include worry, fear, sadness, anger, annoyance. Items for positive emotion encompass delight, satisfaction, hopefulness, relief.
